# Supplementary material
Source: PubMed Central journal article supplement (PMC6298078)
Supplement: pnas.1809378115.sapp.pdf [file pnas.1809378115.sapp.pdf]

1

## 2 **Supplementary Information for**

### 3 **SI-Nanomagnetic properties of the meteorite cloudy zone**

4 **Joshua F. Einsle, Alex Eggeman, Benjamin H. Martineau, Zineb Saghi, Sean M. Collins, Roberts Blukis, Paul A.J. Bagot, Paul**  
5 **A. Midgley, Richard J. Harrison**

6 **Corresponding Author Name.**

7 **E-mail: [jfe26@cam.ac.uk](mailto:jfe26@cam.ac.uk)**

#### 8 **This PDF file includes:**

- 9     Supplementary text
- 10    Figs. S1 to S13
- 11    Tables S1 to S2
- 12    Captions for Movies S1 to S11

#### 13 **Other supplementary materials for this manuscript include the following:**

- 14     Movies S1 to S11

## 15 Supporting Information Text

### 16 Thickness Series Tomographic Quantification

17 S1 presents a schematic diagram showing the methodology for the thickness series tomographic unmixing. Different X-ray  
18 energy dispersive spectroscopy (EDS) signals are recorded depending on the beam trajectory and sample tilt. Volume-mixed  
19 spectra are recorded at each pixel of the tilt series depending on sample orientation. The mixed spectra recorded can be  
20 described symbolically as,

$$21 \Gamma_{tot}(x, y, \theta, E) = t_A(x, y, \theta)\Gamma_A(E) + t_B(x, y, \theta)\Gamma_B(E) \quad [1]$$

22 where  $\Gamma_{tot}$  is the recorded spectral signal as a function of position (x, y), sample tilt-angle  $\theta$ , and energy E. The total signal is  
23 assumed to be a linear combination of signals arising from phase A and phase B, denoted  $\Gamma_A$  and  $\Gamma_B$ . Given the thickness of  
24 each phase  $t_A$  and  $t_B$  the system of equations can be solved for the phase-specific spectra. There are then two unknowns at  
25 each energy which becomes overdetermined for more than two dissimilar trajectories. In the experimental case, many more  
26 trajectories are recorded resulting in a highly overdetermined system. The thickness map unmixing approach used here assumes  
27 the sample is adequately described as comprised of two homogeneous phases.

### 28 Additional Atom Probe Tomography Data Summary

29 The results of eight atom probe tomography (APT) experiments performed on various regions of the cloudy zone, tetrataenite  
30 rim and the kamacite lamella are summarized in Table S1. For the final composition of averages for the cloudy zone we do not  
31 include dataset TazeAPT05 due to large thermal tails in the mass spectra.

32 The raw APT data (Fig. S2) is a dense data set capturing the spatial positions of all the elemental species evaporated. It is  
33 not possible to render all of the atoms captured, so the IVAS software (3.6.12) renders a representative subset. Our method for  
34 determining the composition of the tetrataenite particles and matrix phase are schematically shown in Fig S3. By selecting  
35 cylindrical volumes that are fully contained within the selected phase this results in a more accurate determination of the pure  
36 composition of the phase, at the expense of counting statistics since smaller volumes of atoms are counted.

37 We present reconstructions of the APT data which are not present in the main text in Fig. S2 through S9.

### 38 Proportion of each <100> phase from SPED cluster analysis

39 The fuzzy means cluster analysis was performed on SPED data collected on a TEM lamella initially cut parallel to the [110]  
40 direction and tilted onto a <100> zone axis. Tilting of the lamella has the effect of increasing the effective sample thickness  
41 resulting in each pixel being a mixture of at least tetrataenite and matrix. Over 98% of the pixels in the resulting SPED  
42 orientation maps become classified as one of the three possible c-axis orientation directions. The proportion of each tetrataenite  
43 orientation are summarized in Table S2.

### 44 Kinematic Diffraction data

45 Ideal crystal structures for tetrataenite, and ordered Fe<sub>3</sub>Ni were created using CrystalMaker 9. Kinematic diffraction patterns  
46 were then simulated for these ideal structures using SingleCrystal 2.3. In Fig. S10 we present the three <100> directions  
47 showing three distinct superlattice peaks associated with each unique c-axis direction. Figure S11 presents the two unique  
48 diffraction patterns and real space lattice structures for the [112] and <121> -type directions. Here, only the [112] poses  
49 unique superlattice reflections. Finally, Fig. S12 presents the diffraction data and crystal models for Fe<sub>3</sub>Ni along the <100>  
50 and the <112> directions. Here we observe the presence of the unique <100> superlattice reflections which resemble the  
51 combination of all three <100> from tetrataenite.

### 52 Microstructural Coarsening

53 We present a schematic depiction of the the grain coarsening process described in the discussion of the main text in Fig. S13.

### 54 Supplemental Tables and Figures

| Sample ID    | CZ Region    | Figure    | Bulk                                                   | Volume Fraction<br>Tetrataenite | Tetrataenite                                           | Matrix                                           |
|--------------|--------------|-----------|--------------------------------------------------------|---------------------------------|--------------------------------------------------------|--------------------------------------------------|
| Taz CCZ EDS  | Coarse       | Fig 2, 3a | 68 ± 2 Fe<br>32 ± 2 Ni                                 | 51.5%                           | 52 ± 2 Fe<br>48 ± 2 Ni                                 | 84 ± 2 Fe<br>16 ± 2                              |
| Taz ICZ EDS  | Intermediate | Fig 3b,c  | 76 ± 2 Fe<br>24 ± 2 Ni                                 | 28.3%                           | 52 ± 2 Fe<br>48 ± 2 Ni                                 | 85 ± 2 Fe<br>15 ± 2                              |
| TazeAPT01 *  | Coarse       | S4        | N/D                                                    | 100%                            | 47.5 ± 0.4 Fe<br>51.6 ± 0.4 Ni<br>0.90 ± 0.08 Co       | N/D<br>N/D<br>N/D                                |
| TazeAPT02    | Coarse       | S8        | N/D                                                    | 100%                            | 49.3 ± 0.3 Fe<br>50.5 ± 0.4 Ni<br>0.19 ± 0.03 Co       | 80.8 ± 0.3 Fe<br>19.0 ± 0.3 Ni<br>0.23 ± 0.04    |
| TazeAPT03 *  | Coarse       | S5        | 66.93 ± 0.07 Fe<br>32.82 ± 0.07 Ni<br>0.248 ± 0.007 Co | 48.11%                          | 50.07 ± 0.05 Fe<br>49.71 ± 0.05 Ni<br>0.220 ± 0.004 Co | 82.80 ± 0.03 Fe<br>17.04 ± 0.03 Ni               |
| TazeAPT04    | Fine         | Fig 4     | 69.36 ± 0.02 Fe<br>30.1 ± 0.02 Ni<br>0.546 ± 0.003 Co  | 37.00%                          | 48.4 ± 0.4 Fe<br>51.1 ± 0.4 Ni<br>0.60 ± 0.05 Co       | 81.8 ± 0.2 Fe<br>17.8 ± 0.2 Ni<br>0.47 ± 0.04 Co |
| TazeAPT05 ** | Fine         | S8        | 66.11 ± 0.10 Fe<br>27.80 ± 0.11 Ni<br>2.90 ± 0.04 Co   | 24.5%                           | 39.0 ± 0.4 Fe<br>59.1 ± 0.4 Ni<br>1.85 ± 0.12 Co       | 80.8 ± 0.3 Fe<br>19.0 ± 0.3 Ni<br>2.2 ± 0.2 Co   |
| TazeAPT06    | Fine         | S9        | 71.29 ± 0.18 Fe<br>27.80 ± 0.18 Ni<br>0.90 ± 0.04 Co   | 34.8%                           | 49.3 ± 1.5 Fe<br>49.1 ± 1.5 Ni<br>1.5 ± 0.4 Co         | 83.0 ± 0.4 Fe<br>16.4 ± 0.4 Ni<br>0.55 ± 0.09 Co |
| TazeAPT07    | Kamacite     | S6        | 95.28 ± 0.02 Fe<br>4.16 ± 0.02 Ni<br>0.561 ± 0.007 Co  | 0%                              |                                                        |                                                  |
| TazeAPT08    | Tetrataenite | S6        | 51.11 ± 0.09 Fe<br>48.78 ± 0.09 Ni<br>0.113 ± 0.006 Co | 100%                            | Same as bulk                                           |                                                  |

**Table S1. Compositions reported in at % for each of the metallurgical phases in the Cloudy Zone (CZ) samples as well as pure kamacite and tetrataenite. The volume fraction for coarse cloudy zone is not fully representative, since in 3d-EDS and APT complete tetrataenite precipitates are not recovered. All errors reported are equal to two standard deviations based on counting statistics. All APT compositional data might be inaccurate due to excessive thermal noise in the mass spectrum.**

| Region       | Tetrateenite Orientation |        |        | Unclassified |
|--------------|--------------------------|--------|--------|--------------|
|              | 100                      | 010    | 100    |              |
| Coarse       | 52.9 %                   | 13.9 % | 32.7 % | 0.4%         |
| Intermediate | 15.2 %                   | 25.4%  | 58.1 % | 1.2%         |
| Fine         | 29.0%                    | 28.8%  | 40.9%  | 1.3%         |

**Table S2. Areal density of <100> SPED orientation maps for three different regions of the cloudy zone. High tilt angle makes resolving independent matrix component impossible.**

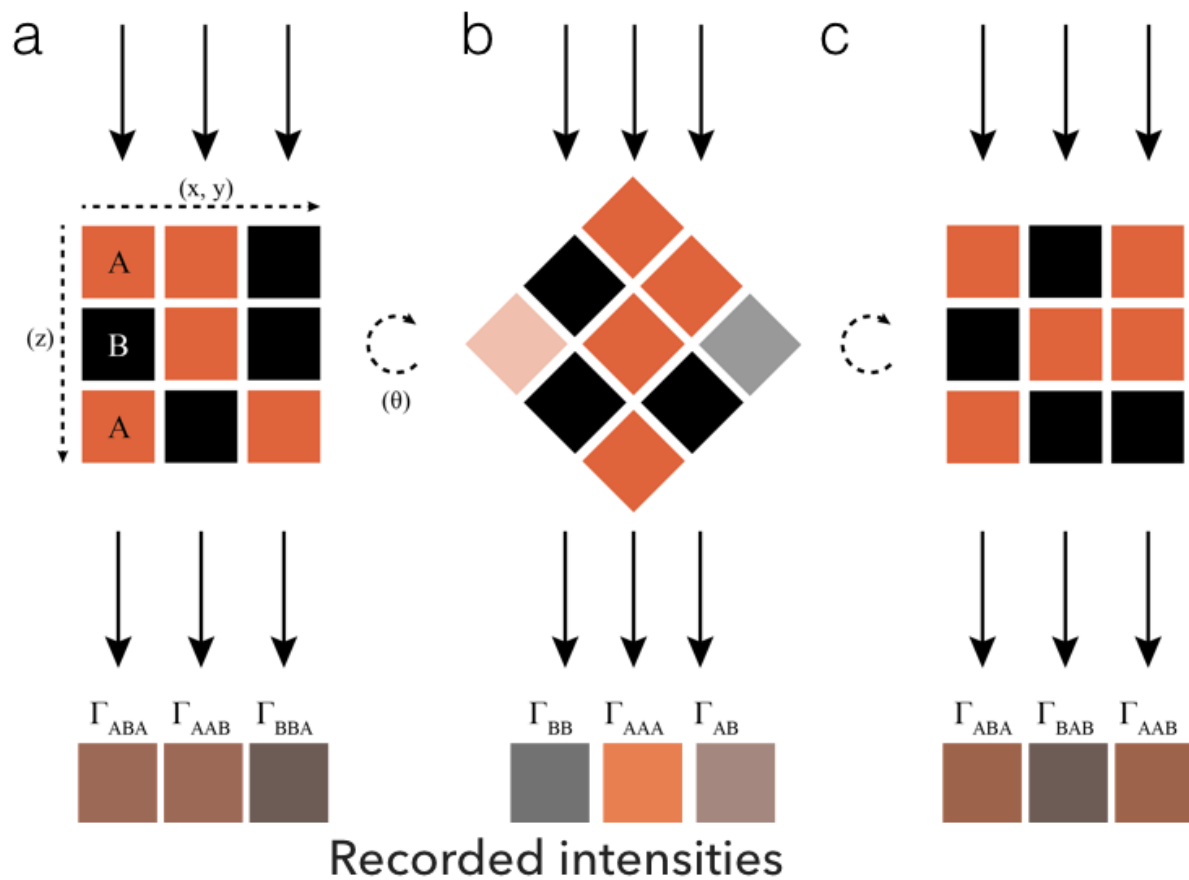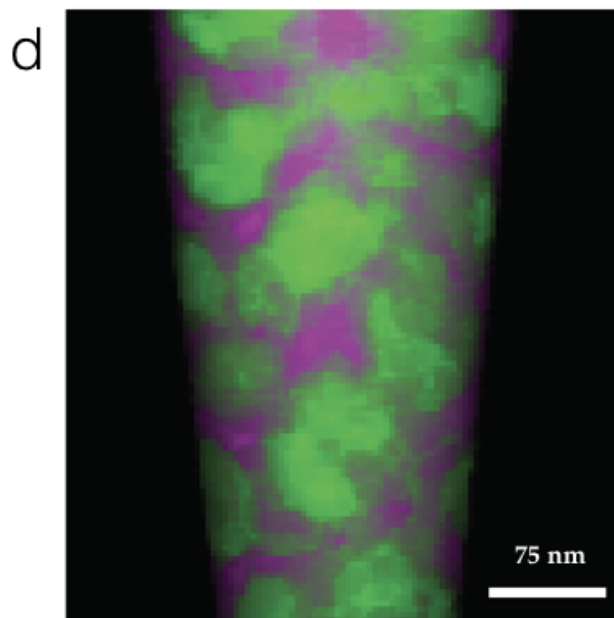

**Fig. S1.** Schematic depiction of the spectrographic unmixing method. a-c, Illustration of a two-phase square model object. The two phases A and B are color-coded as orange and black, respectively. The resultant spectra  $\Gamma$  are reasonably approximated as linear mixtures. d, A thickness map of an experimental sample, derived from segmentation of a three-dimensional volume reconstruction. Here the thickness of the two phases is coded as magenta (matrix) or green (tetraaenite).

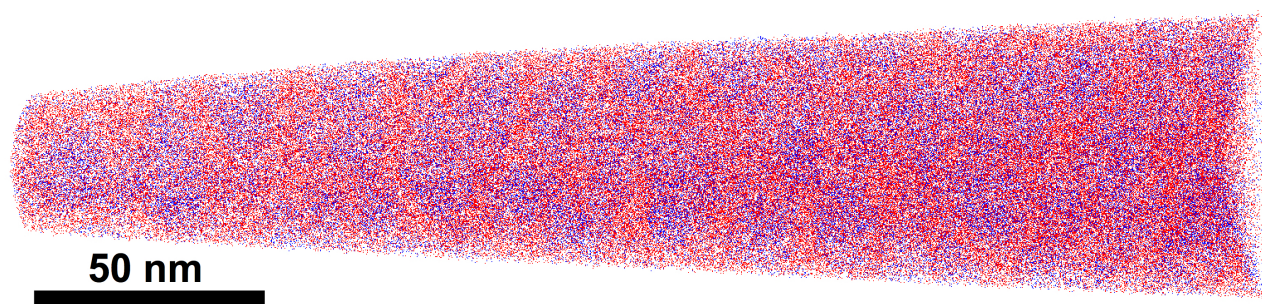

**Fig. S2.** A 3D output of the APT showing the positions of the detected atoms (Sample Medium CZ 1 from the table S1). The red and blue dots represent individual Fe and Ni atoms respectively. Only few % of all atoms recorded are shown to avoid clutter. Even in this raw output image clustering of Ni atoms is noticeable.

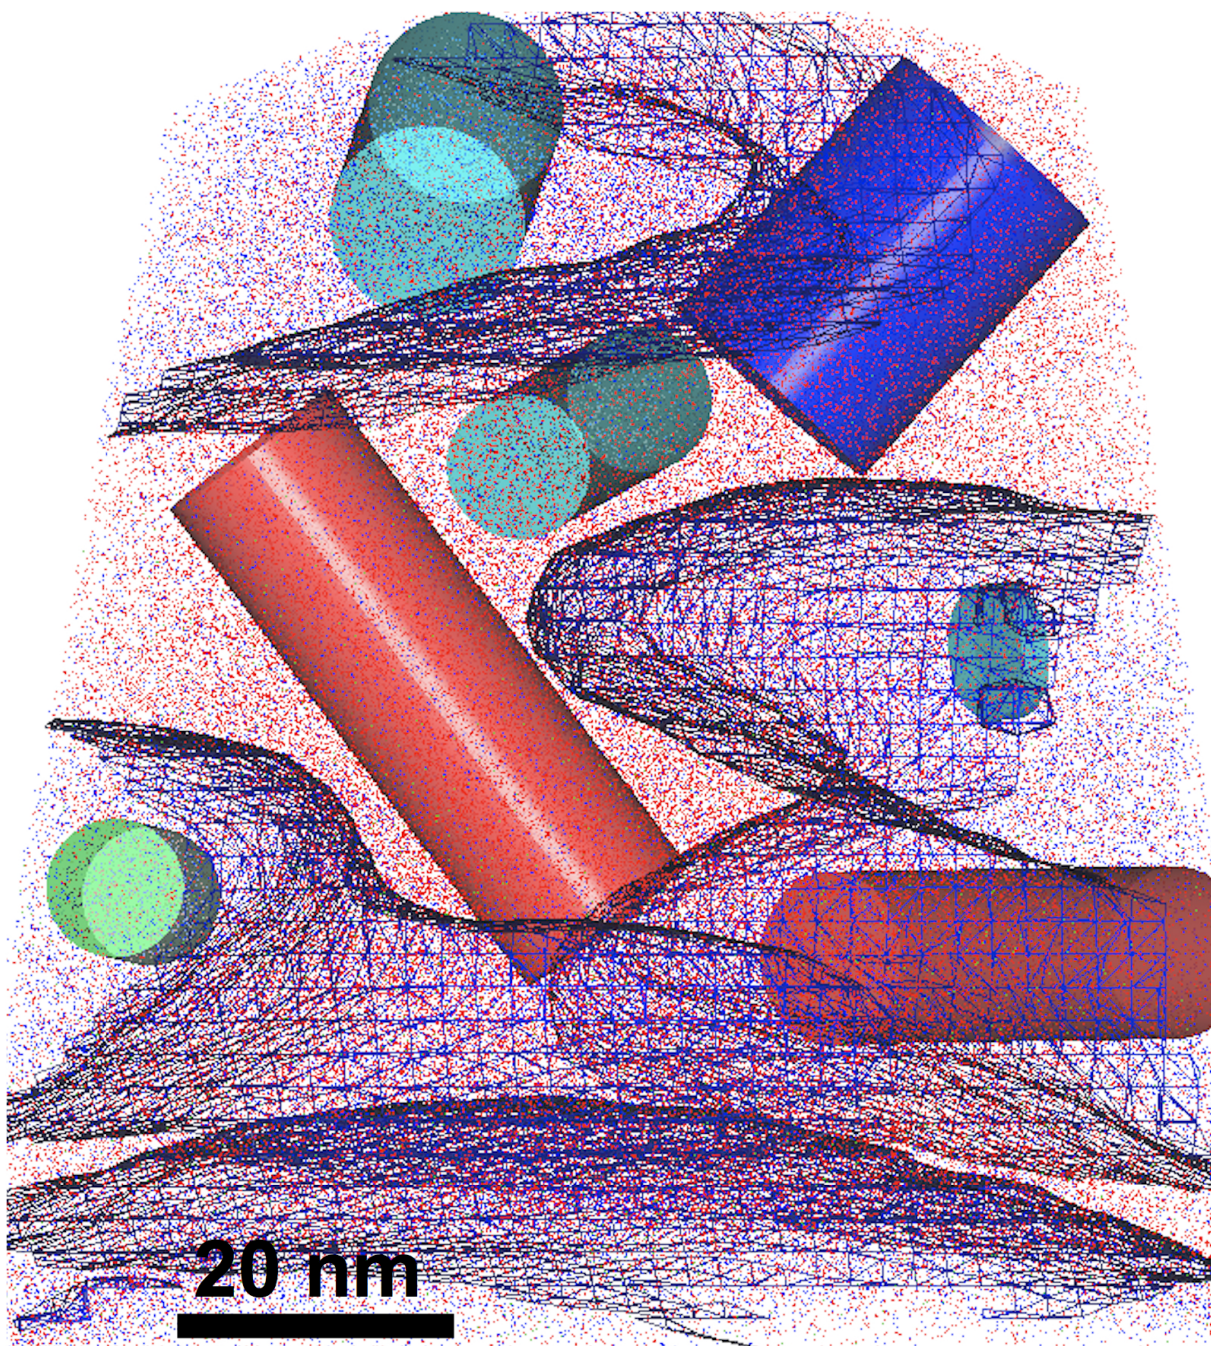

**Fig. S3.** An example of cylindrical ROIs placed inside the tetraenaite particles and the matrix for composition determination. The wire mesh represents 41 at% Ni isosurface and shows the edges of the tetraenaite particles. This is a sample of a coarse cloudy zone (sample Coarse CZ 3 in table S1).

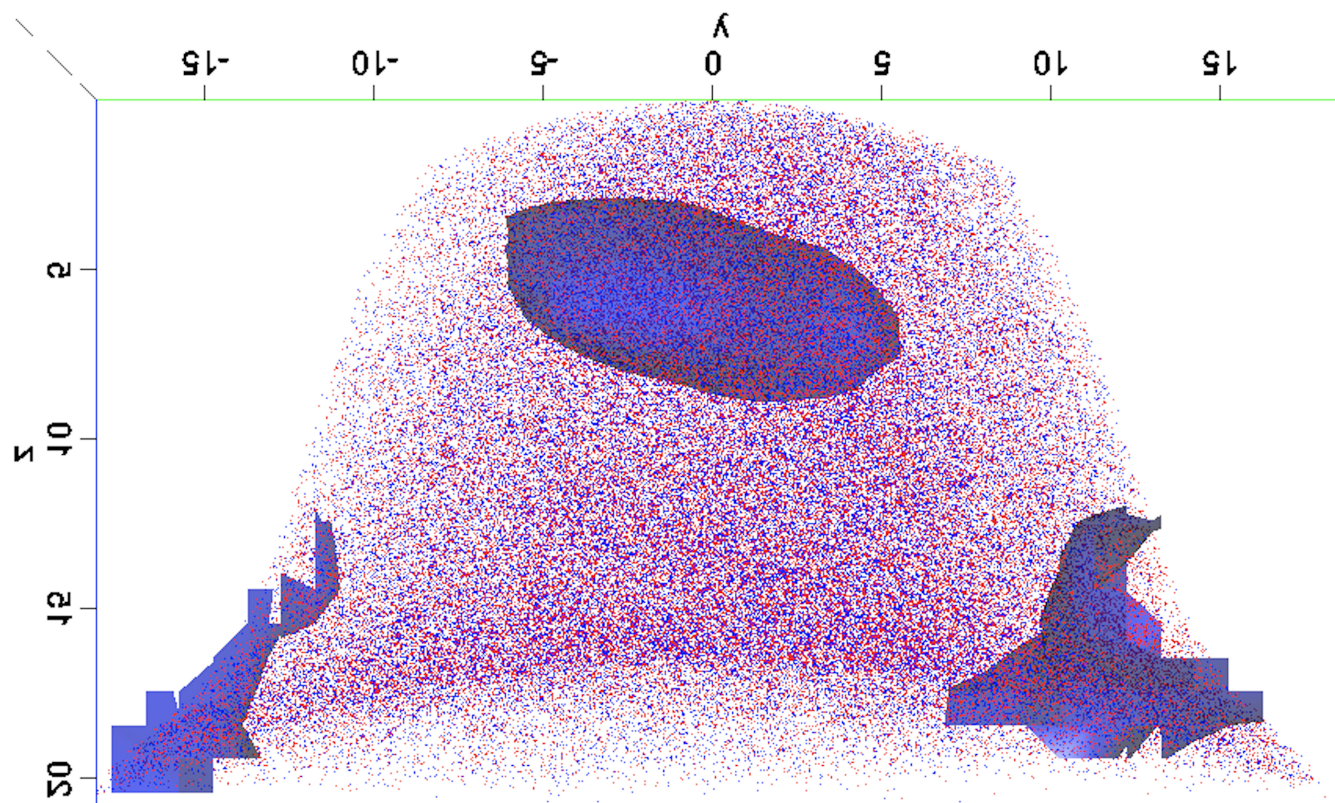

Fig. S4. Small region of the coarse cloudy zone studied using 3D-EDS. Due to oxidation, tip fractured shortly after evaporation began. However, it is possible to observe the presence of a secondary precipitate in the large tetrataenite island captured in the reconstitution (sample TazeAPT1 in table S1). Isosurfaces are shown at 32.5 at% Ni concentration.



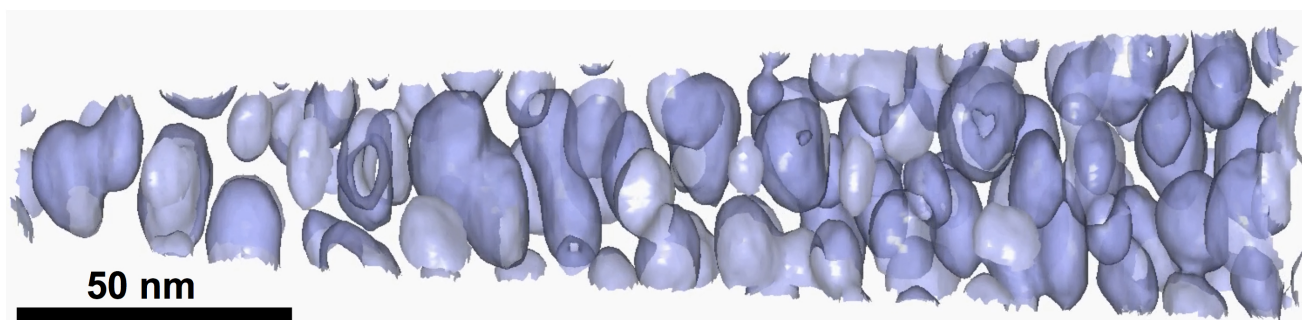

**Fig. S5.** A sample of the medium cloudy zone. Only 44 at% Ni isosurface is shown marking the locations and shapes of the tetraenaite particles. This sample corresponds to sample Medium CZ 1 in the table [S1](#).

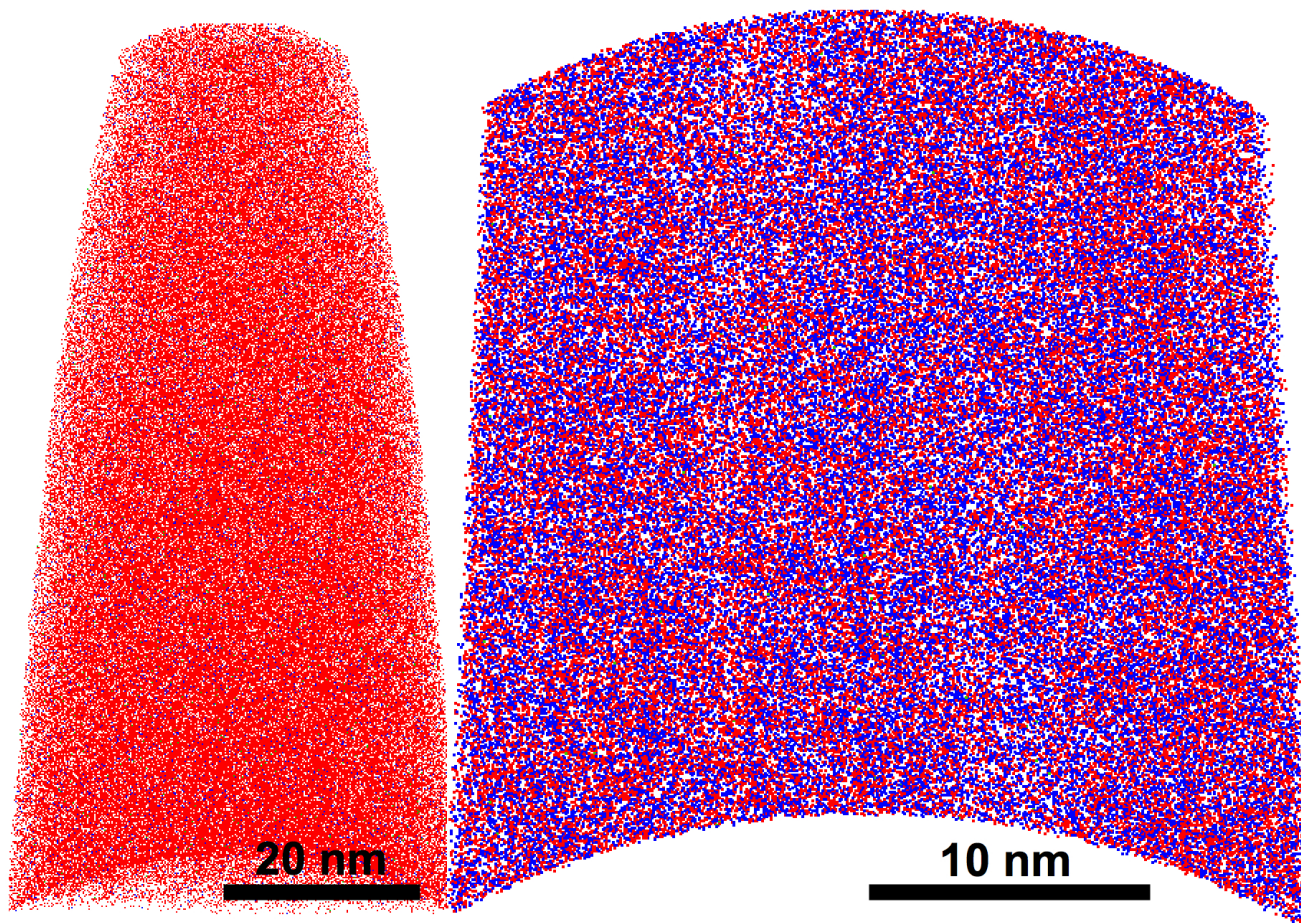

**Fig. S6.** Samples of pure kamacite (left) and tetraenaite (right). Kamacite is shown as a raw output with dots representing atoms in the whole volume of the needle. Tetraenaite sample is shown a 1.5 nm thick slice with all atoms detected shown. Red, blue and green dots represent Fe, Ni and Co atoms respectively. Vertical features of higher and lower atom density in the tetraenaite indicate the sample has been well aligned along a crystallographic pole, (100) in this case.

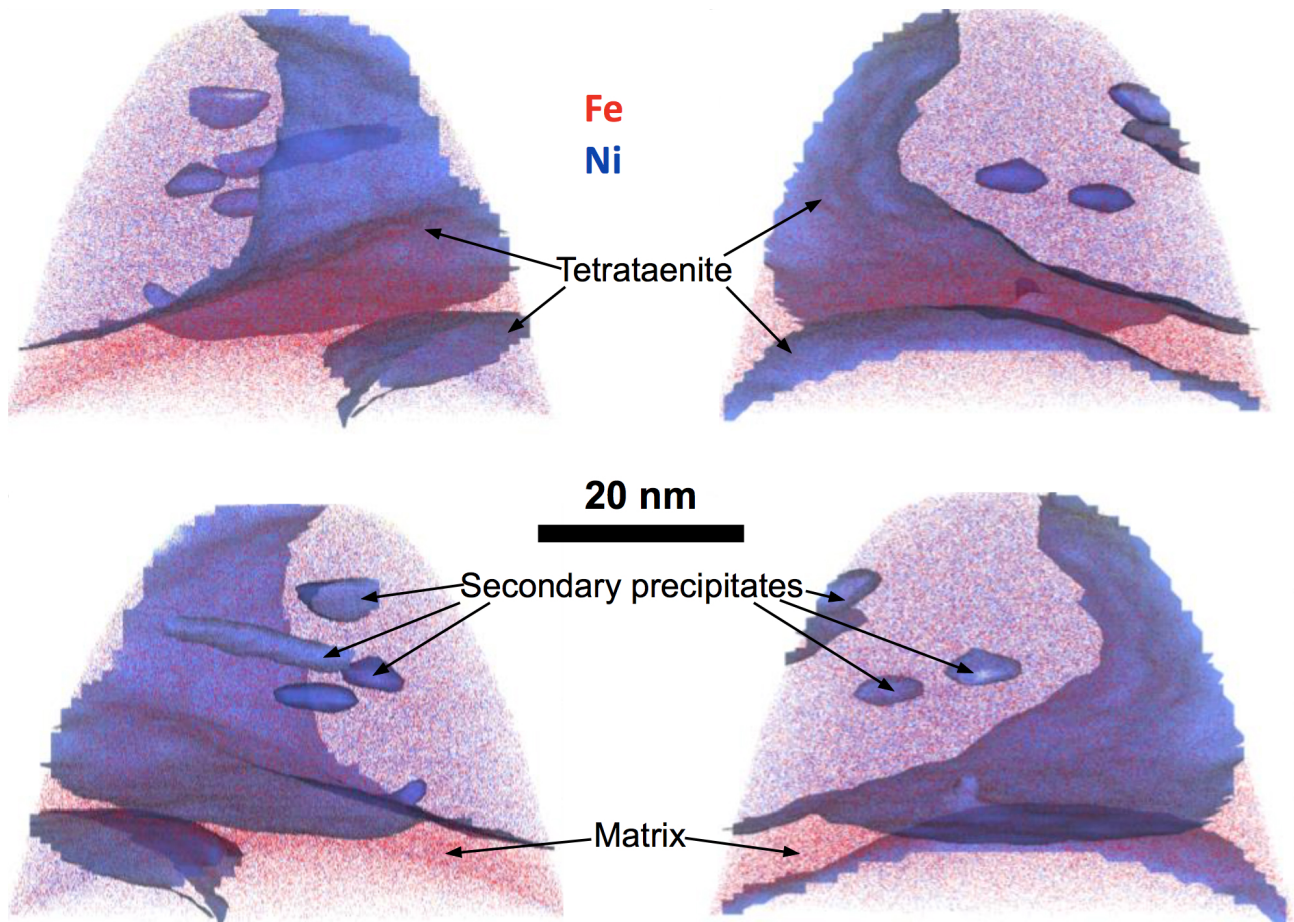

**Fig. S7.** A sample of the coarse cloudy zone shown from 4 different viewing angles at right angles to each other. The sample captures parts of two tetraenaite particles. 7-12 nm thick layer of matrix separates the two islands in the lower part of the sample. Secondary precipitates can be seen inside the upper tetraenaite particle. Red and blue dots represent Fe and Ni atoms respectively. The isosurface is drawn at 37.5 at% Ni. This sample corresponds to sample Coarse CZ 2 in the table S1.

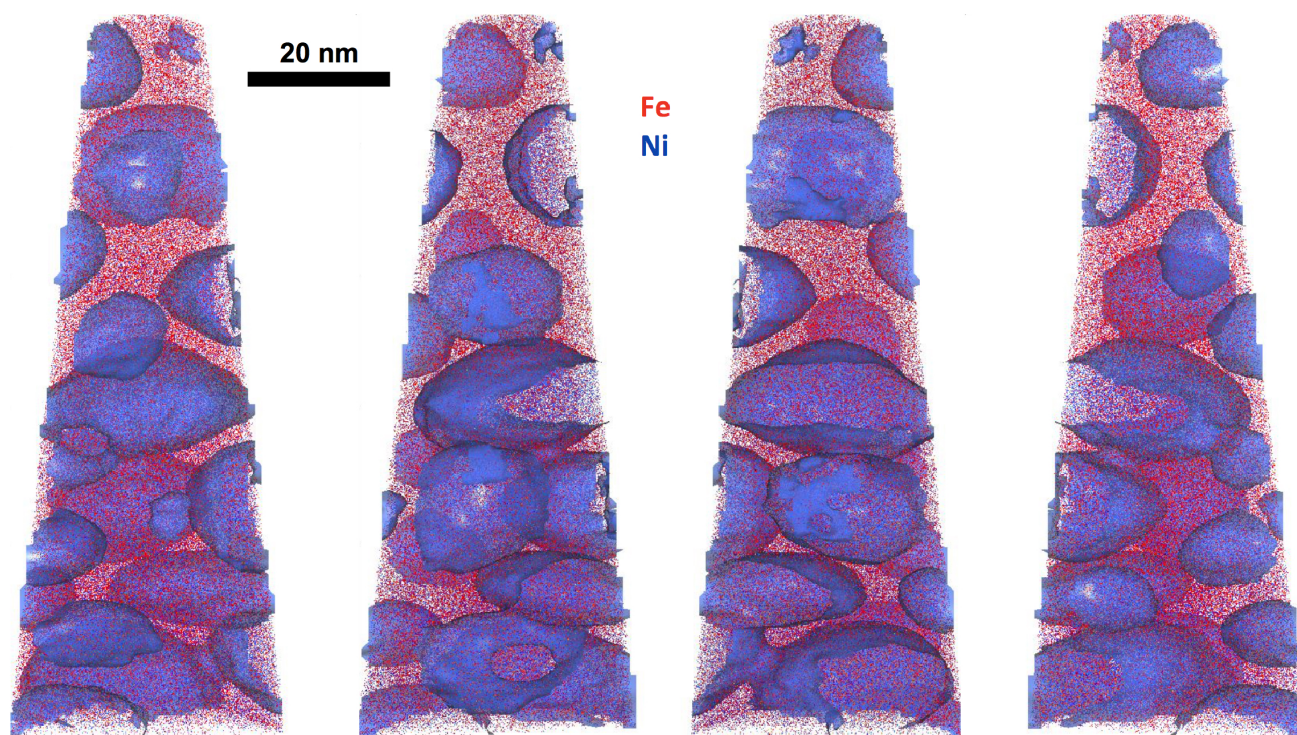

**Fig. S8.** A sample of the medium cloudy zone shown from 4 different viewing angles at right angles to each other. Secondary precipitates were not detected in this sample. Red and blue dots represent Fe and Ni atoms respectively. The isosurface is drawn at 37 at% Ni. This sample corresponds to sample Medium CZ 2 in the table S1.

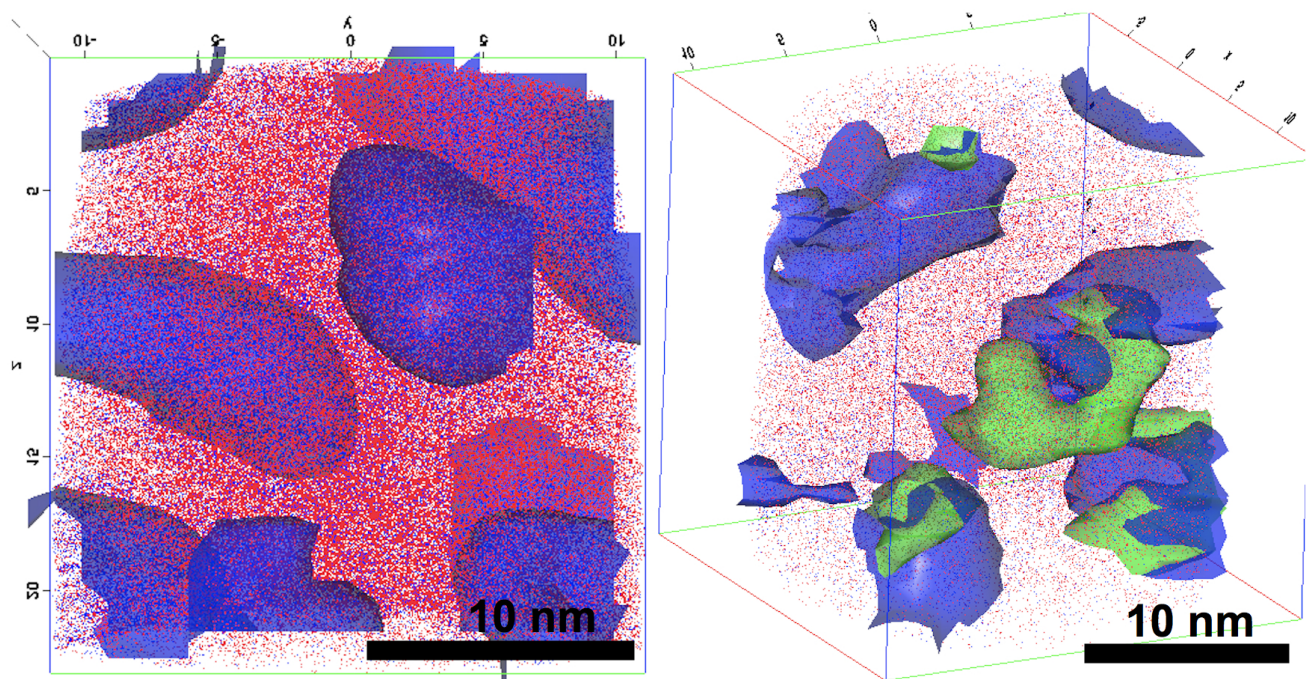

**Fig. S9.** A sample of the fine cloudy zone showing 5-10 nm size particles with 40.4 at% Ni isosurface shown (left). 45 at% Ni isosurface (blue) combined with 2 at% Co isosurface (green) (right). Red, blue and green dots correspond to Fe, Ni and Co atoms respectively.

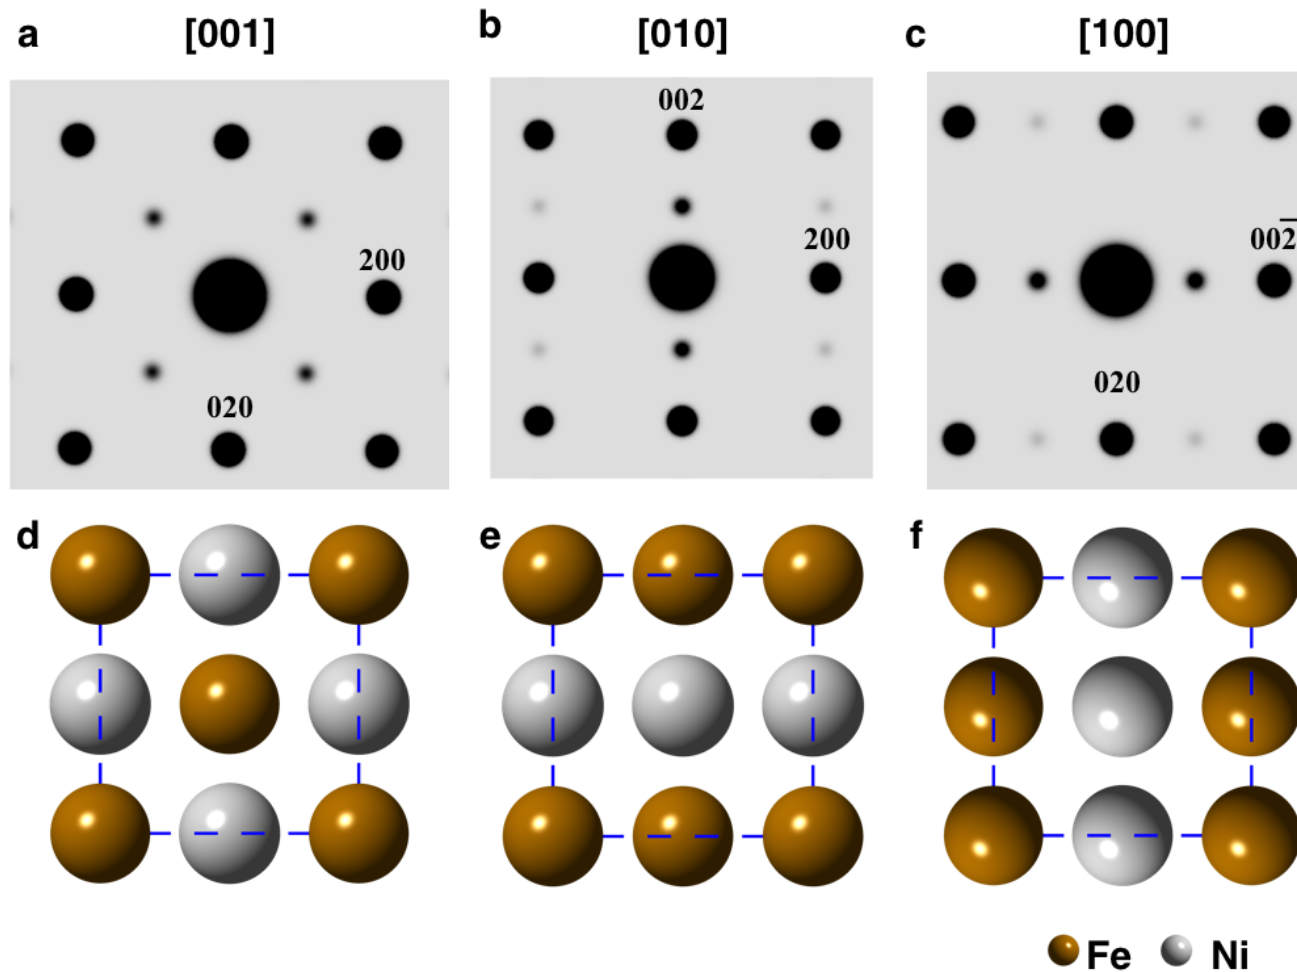

Fig. S10. Kinematic diffraction patterns and model structures for tetraetaenite when viewed along the three principle crystallographic directions,  $\langle 100 \rangle$ .

**a****[112]**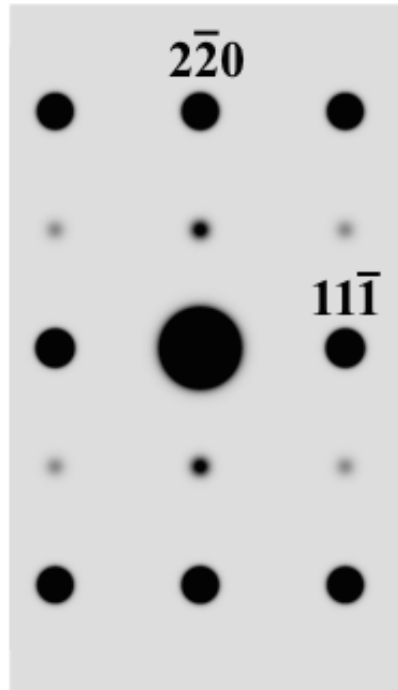**b****<121>**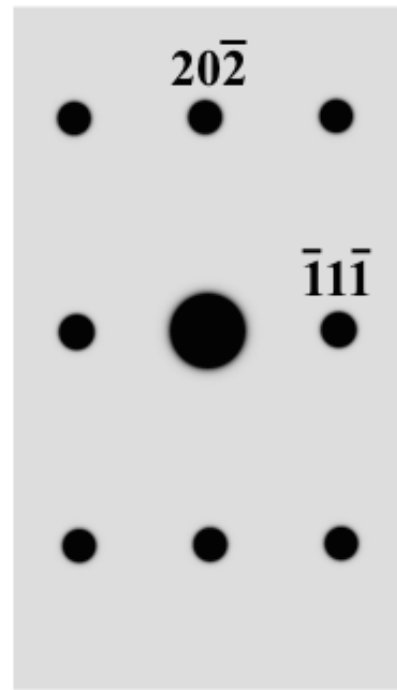**c**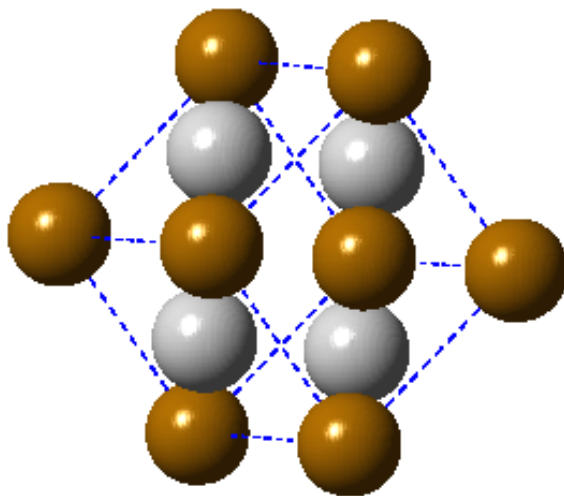**d**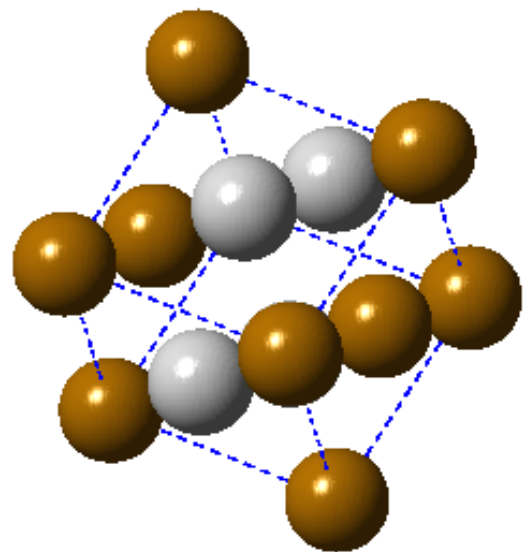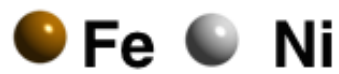

**Fig. S11.** Kinematic diffraction patterns and model structures for tetraenaite when viewed along the [112] or the <121> (this includes the [121] and [211]-like directions).

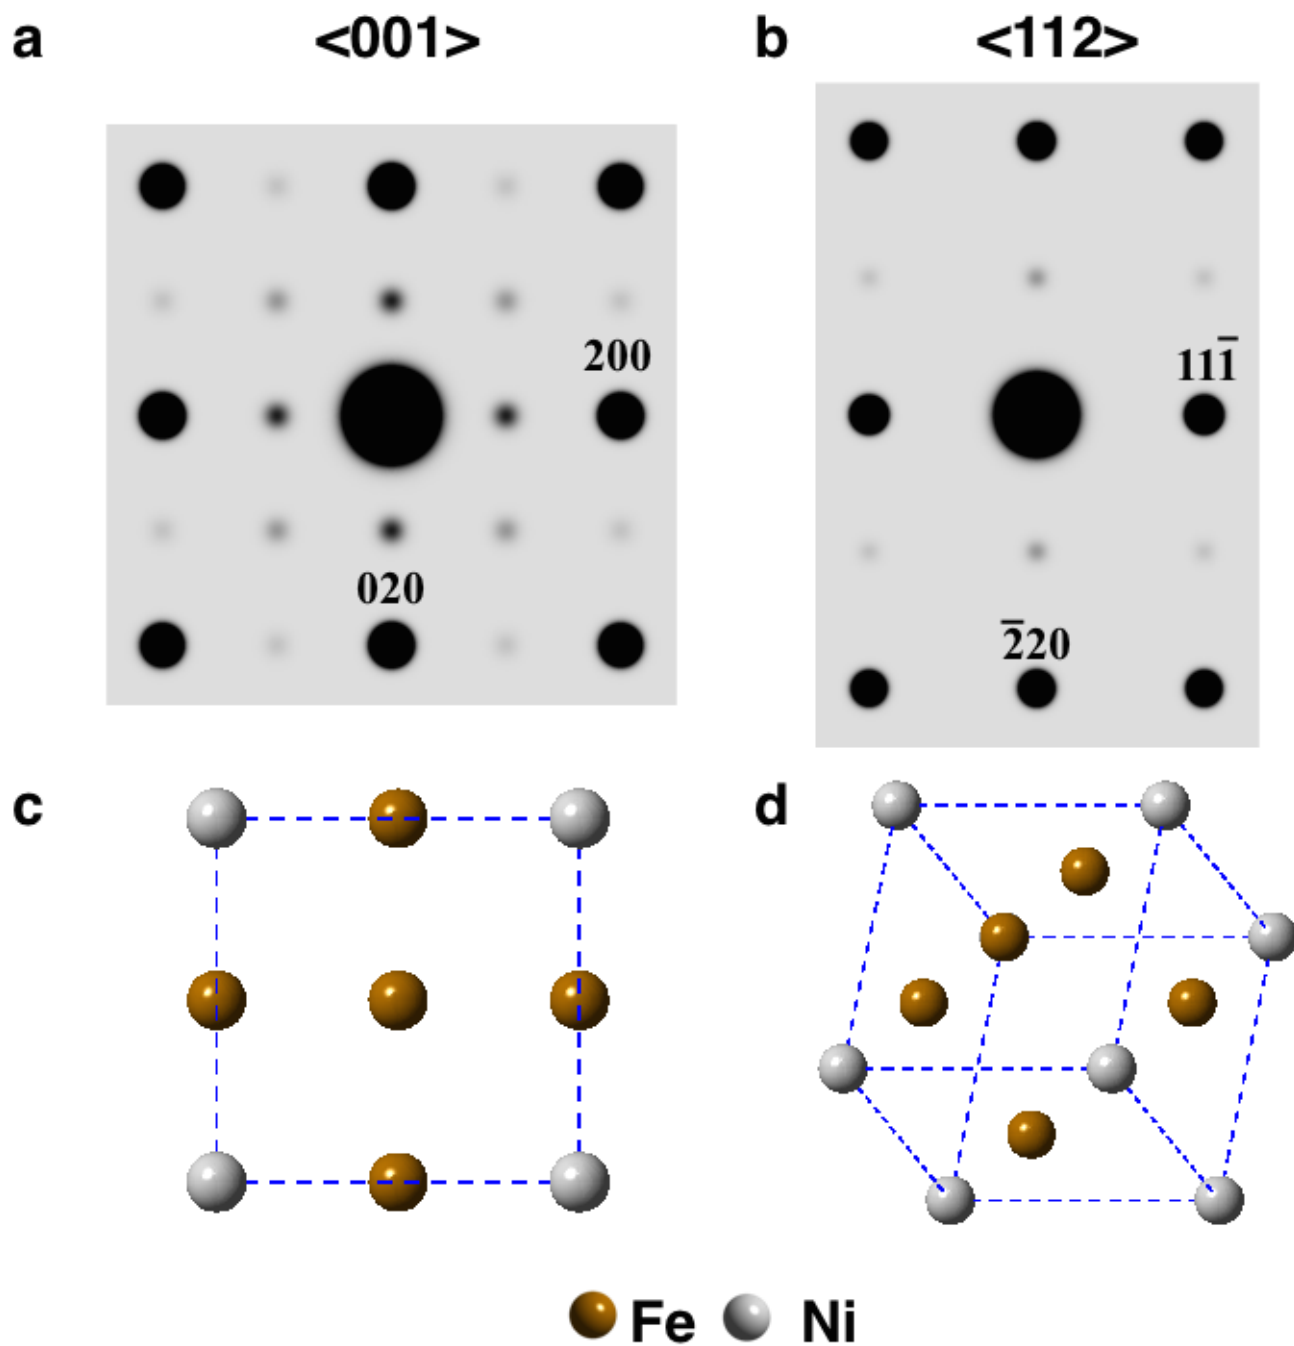

**Fig. S12.** Kinematic diffraction patterns and ideal structures for  $\text{Fe}_3\text{Ni}$  when viewed along the principle crystallographic directions,  $\langle 100 \rangle$ , as well as the  $\langle 112 \rangle$  directions. Due to the symmetry of the  $L1_2$  structure there is one pattern for each of the two families of directions.



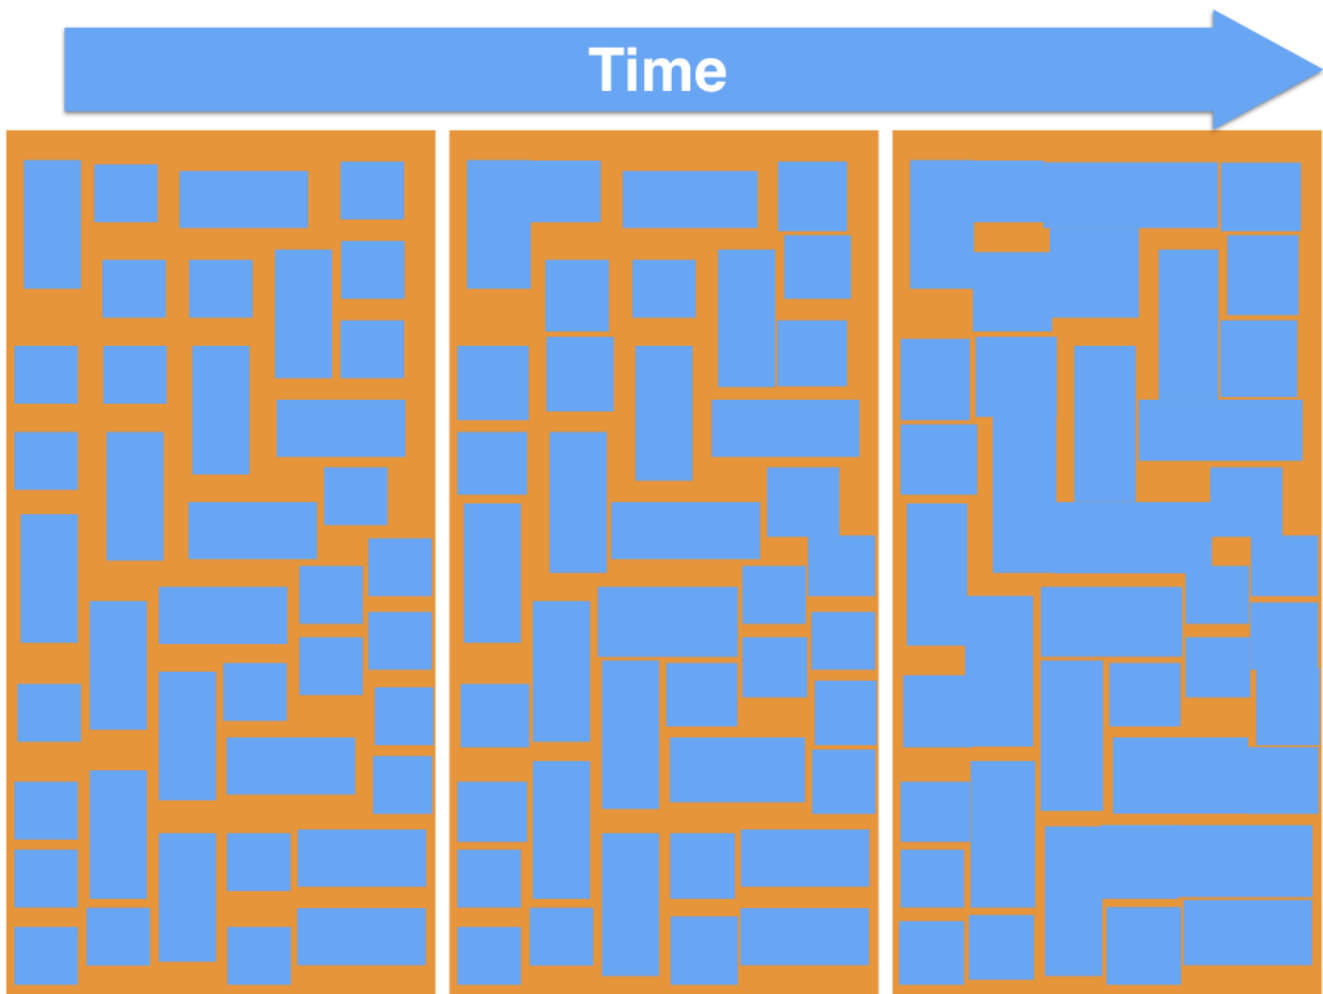

**Fig. S13.** Schematic drawing showing grain coarsening process of the cloudy zone as a function of time.

- 55 Movie S1. Volume render of nickel concentration of the coarse cloudy zone. (Arbitrary units)
- 56 Movie S2. Volume render of nickel concentration of the medium cloudy zone. (Arbitrary units)
- 57 Movie S3. Proxigram showing isosurfaces defined by 32.5 at % Ni content in the fine cloudy zone. Upper  
58 half of APT data set collected.
- 59 Movie S4. Proxigram showing isosurfaces defined by 32.5 at % Ni content in the fine cloudy zone. Lower half  
60 of APT data set collected.
- 61 Movie S5. Volume mesh for three particles extracted from the medium cloudy zone.
- 62 Movie S6. Hysteresis behavior for the red particle in S5 simulated individually. These depict the magnetic  
63 behavior as the uniaxial anisotropy was set to the major (left), intermediate (center), and minor axis of the  
64 particle. These start at the remanence state and proceed towards saturation.
- 65 Movie S7. Hysteresis behavior for the white particle in S5 simulated individually. These depict the magnetic  
66 behavior as the uniaxial anisotropy was set to the major (left), intermediate (center), and minor axis of the  
67 particle. These start at the remanence state and proceed towards saturation.
- 68 Movie S8. Hysteresis behavior for the blue particle in S5 simulated individually. These depict the magnetic  
69 behavior as the uniaxial anisotropy was set to the major (left), intermediate (center), and minor axis of the  
70 particle. These start at the remanence state and proceed towards saturation.
- 71 Movie S9. Hysteresis behavior for the three particles simulated together as non-interacting (left) and inter-  
72 acting particles (right) starting from the remanence state and proceeding towards saturation.
- 73 Movie S10. Movie showing the change in magnetic state as the particles changes from the high temperature  
74 taenite to low temperature tetrataenite.
- 75 Movie S11. Movie showing the motion of a sharp domain wall in response to the applied magnetic field.
